# Supplementary material for: Pathogenic Effect of Prevotella intermedia on a Mouse Pneumonia Model Due to Methicillin-Resistant Staphylococcus aureus With Up-Regulated α-Hemolysin Expression
Source: PubMed Central journal article supplement (PMC7575765; doi:10.3389/fmicb.2020.587235), 2020-10-07

Figure S1

(A)

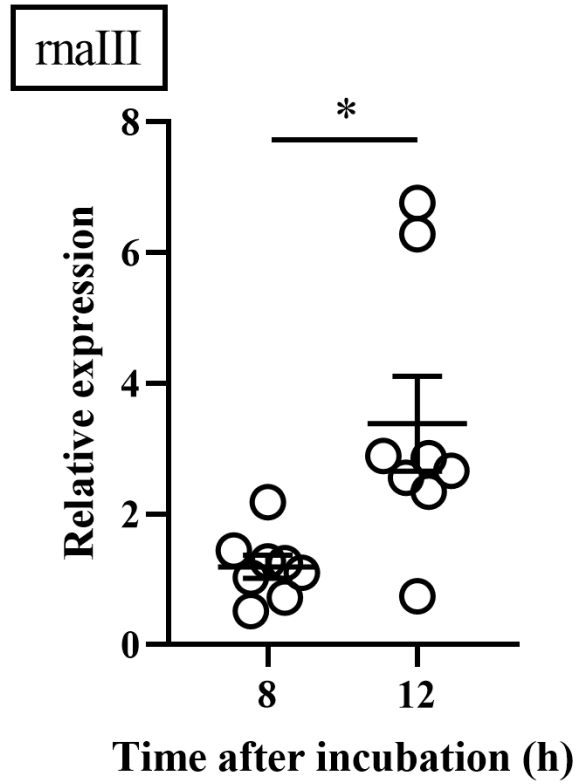

(B)

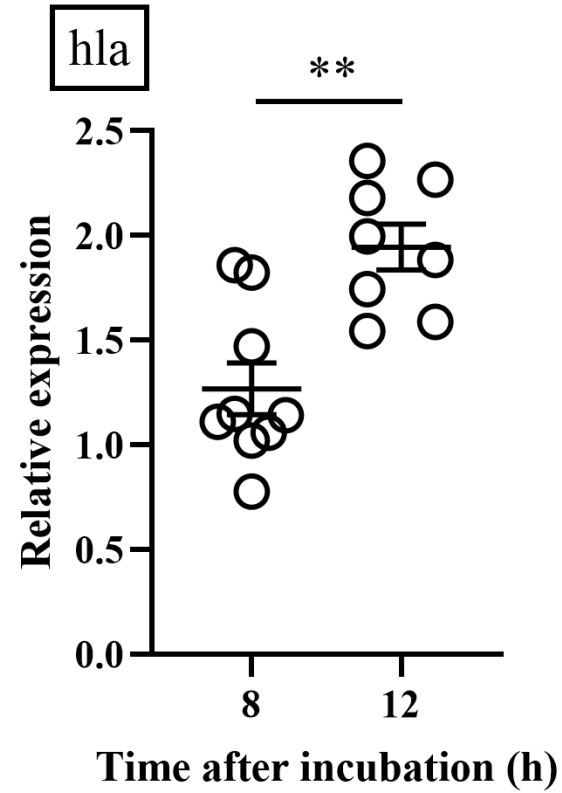

(C)

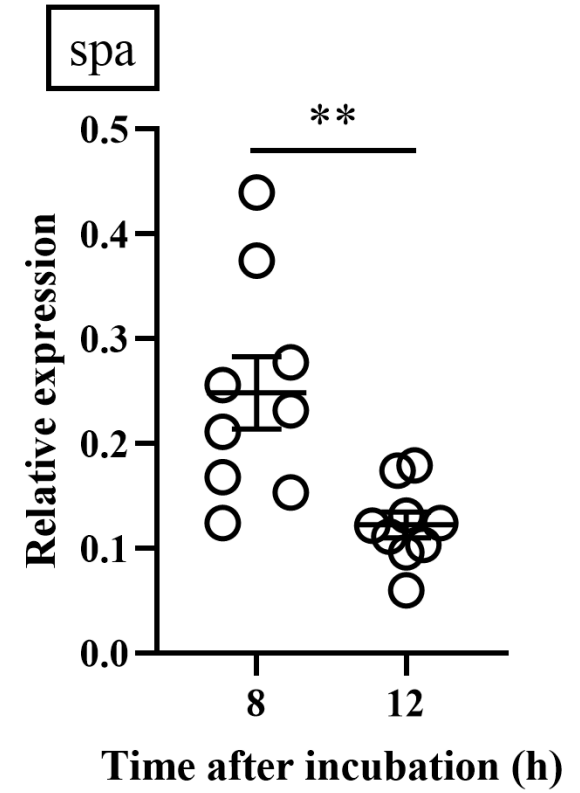

Figure S2

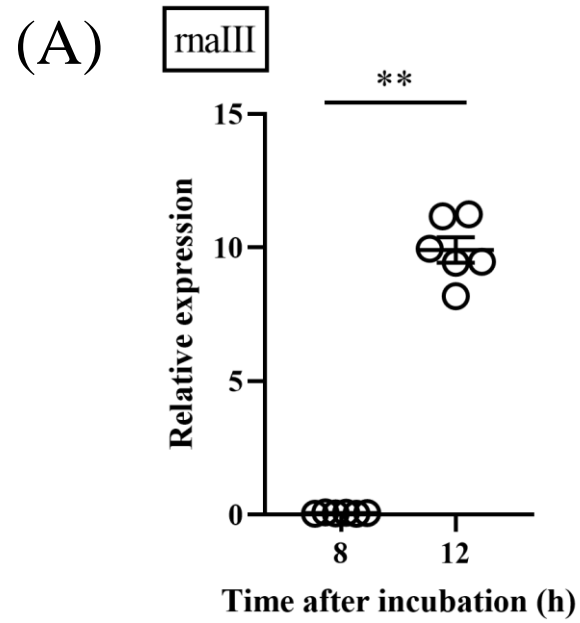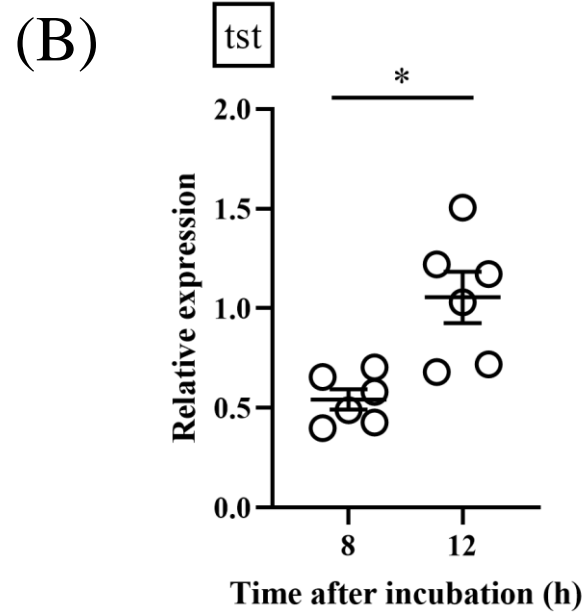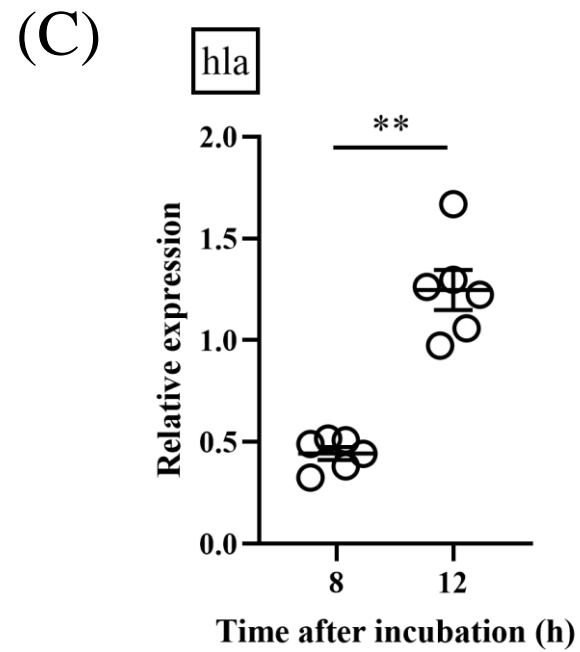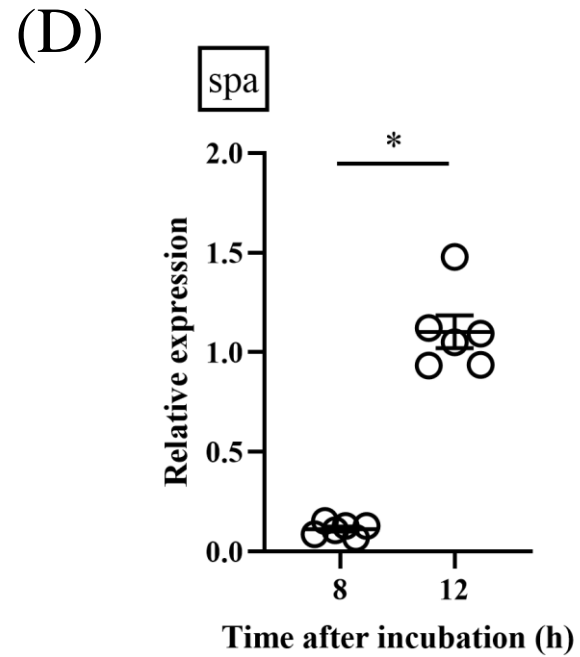

Figure S3

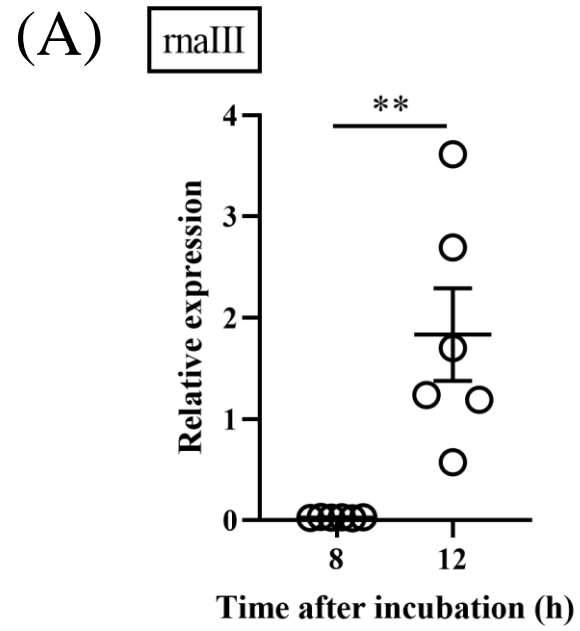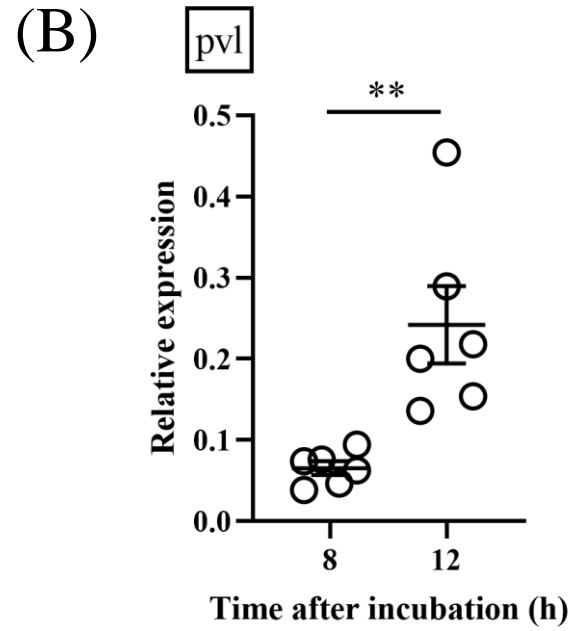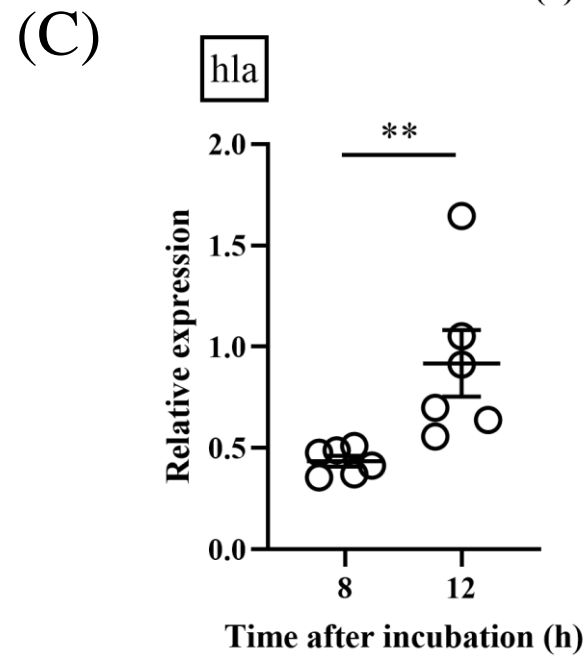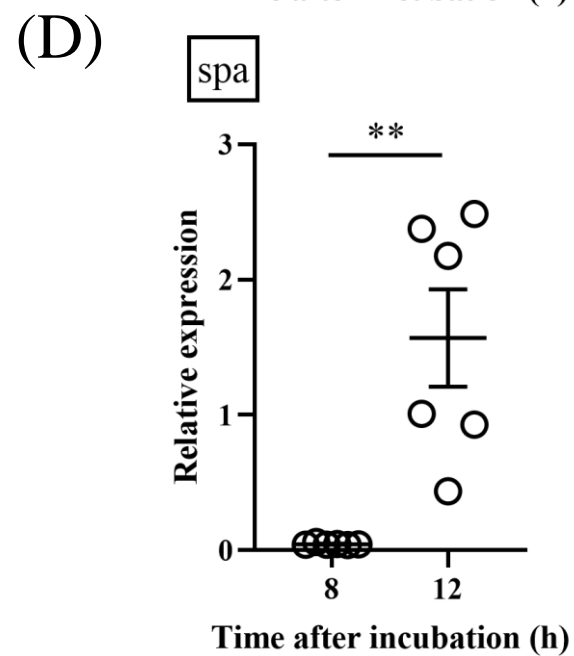

Supplement: Data_Sheet_1.pdf [file Data_Sheet_1.pdf]
